# Supplementary material for: Gemini ionic liquid-based surfactants: efficient synthesis, surface activity, and use as inducers for the fabrication of Cu2O nanoparticles
Source: Royal Society of Chemistry journal article supplement (doi:10.1039/d3ra04646j), 2023-01-01
Supplement: d3ra04646j1.pdf [file d3ra04646j1.pdf]

*Supplementary information*

**Gemini ionic liquid-based surfactants: Efficient synthesis, surface activity, and use as inducers for the fabrication of Cu<sub>2</sub>O nanoparticles**

Kyrillos Roshdy<sup>#</sup>, Hany I. Mohamed<sup>#,\*</sup>, Mohamed H. Ahmed, Wagdy I. El-DougDoug,  
Mohamed A. Abo-Riya\*

*Chemistry Department, Faculty of Science, Benha University, Benha 13518, Egypt*

<sup>#</sup> These authors are equally contributed to this work

\*Corresponding authors:

Dr. Mohamed A. Abo-Ryia

*Chemistry Department, Faculty of Science, Benha University, Benha 13518, Egypt*

Email: [mohamed.aborya@fsc.bu.edu.eg](mailto:mohamed.aborya@fsc.bu.edu.eg)

ORCID: 0000-0002-6754-1720

Dr. Hany I. Mohamed

*Chemistry Department, Faculty of Science, Benha University, Benha 13518, Egypt*

Email: [hany.ibrahim@fsc.bu.edu.eg](mailto:hany.ibrahim@fsc.bu.edu.eg)

ORCID: 0000-0002-1733-7801

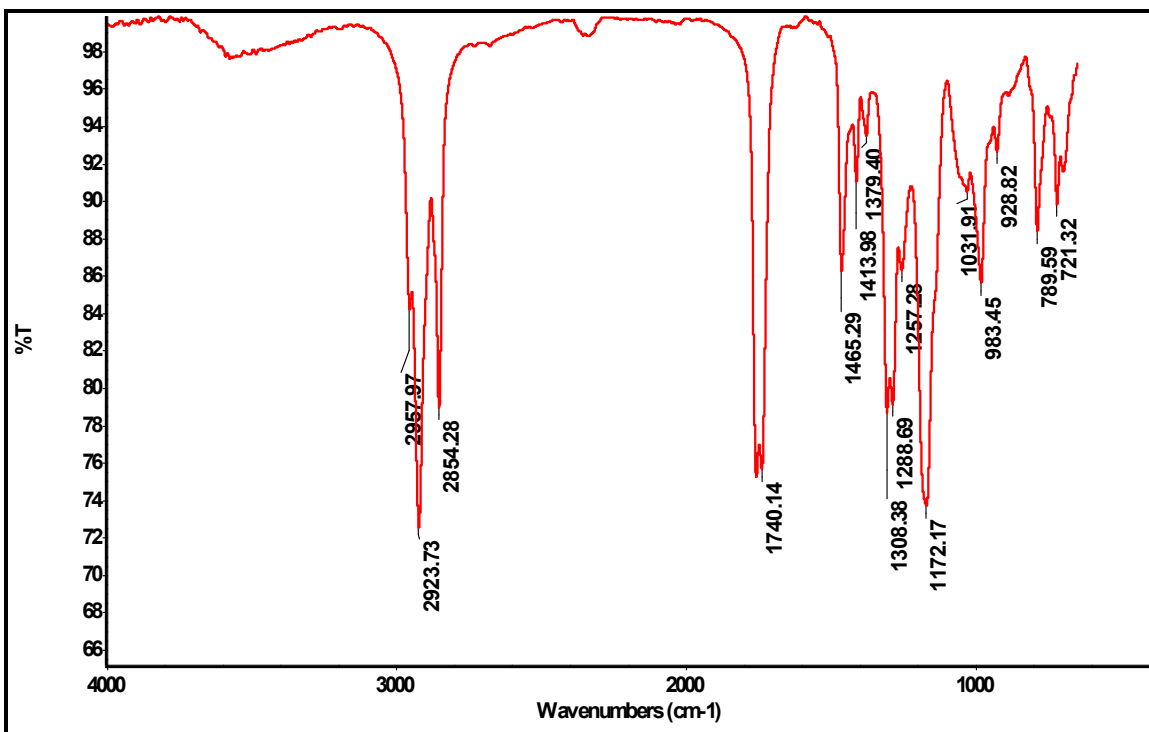

Figure S1. FT-IR spectrum of decyl 2-chloroactate 2a.

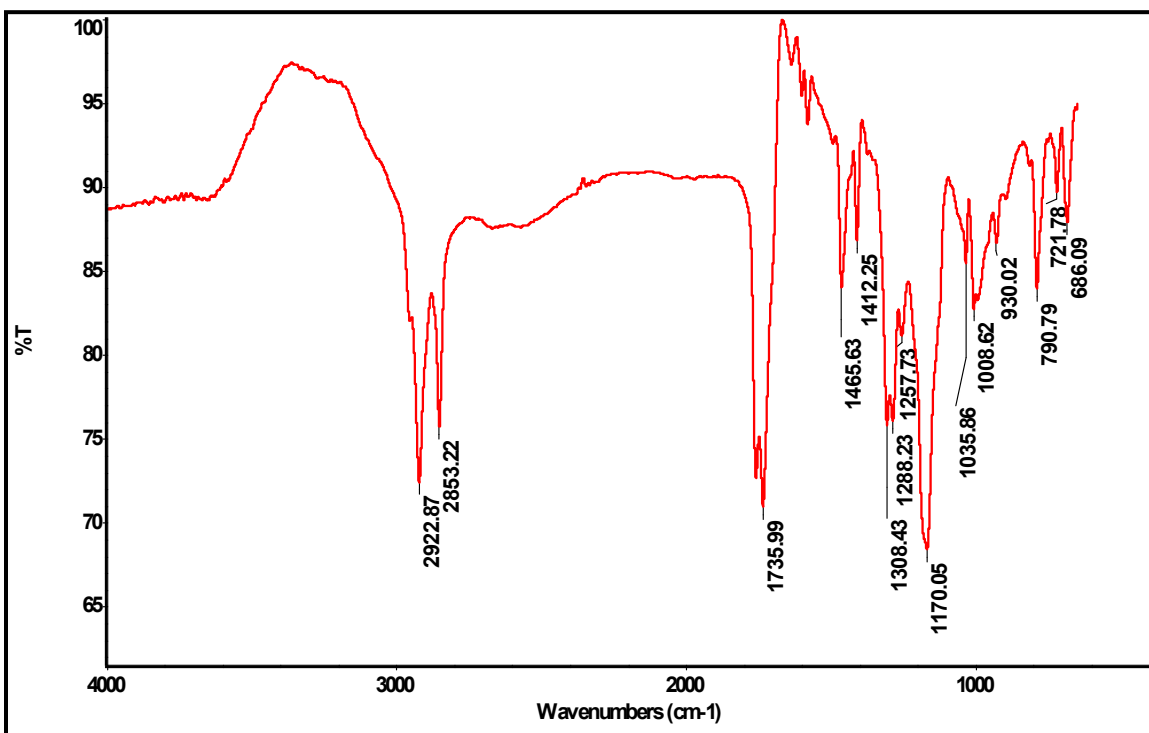

Figure S2. FT-IR spectrum of dodecyl 2-chloroactate 2b.

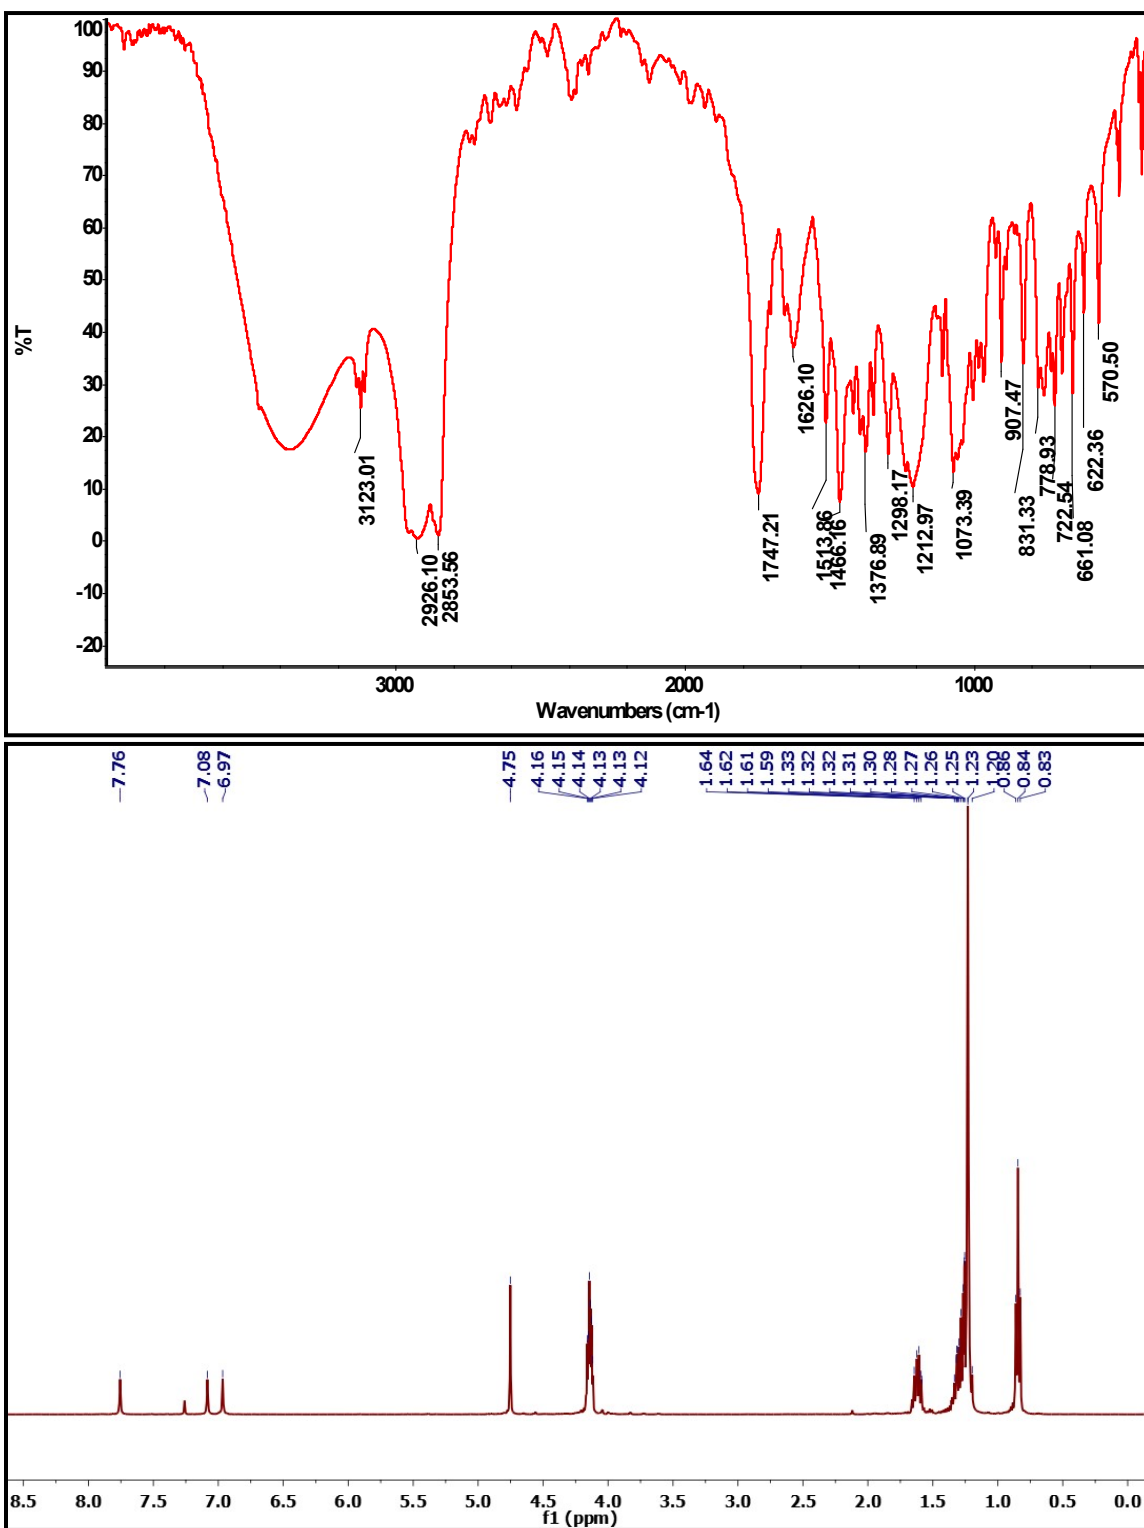

Figure S3. FT-IR and <sup>1</sup>H NMR spectra (CDCl<sub>3</sub>) of alkyl imidazole derivative 3a.

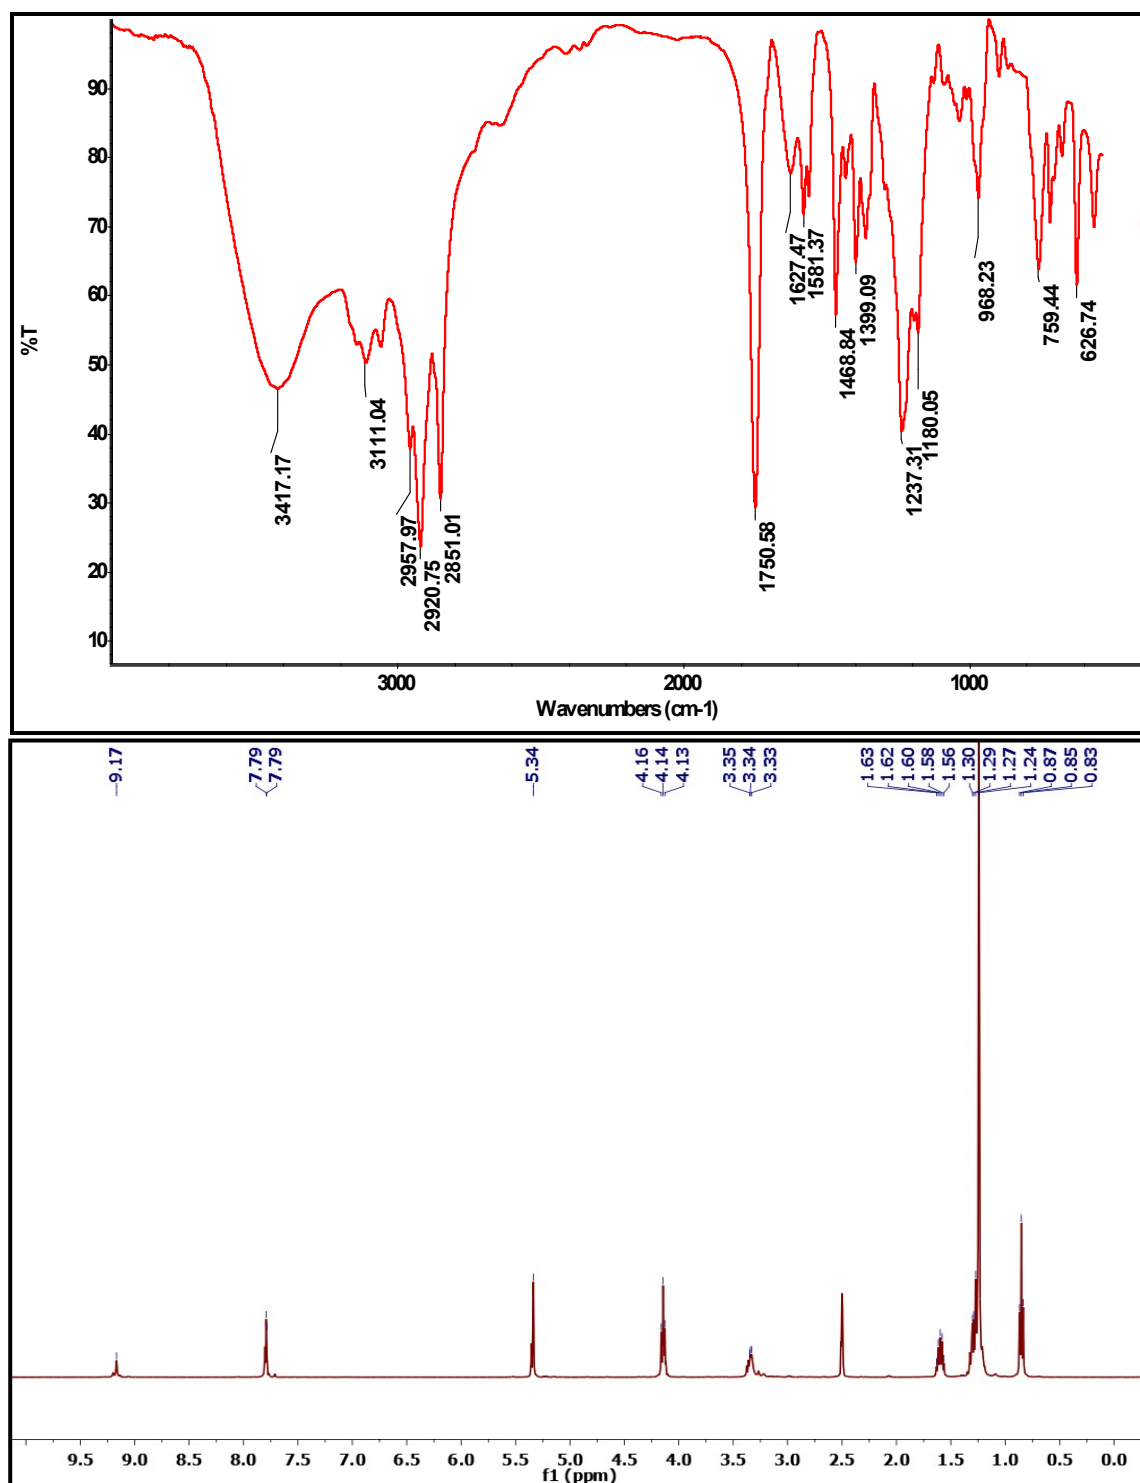

Figure S4. FT-IR and <sup>1</sup>H NMR (DMSO-*d*<sub>6</sub>) spectra of the GILBS 4b.

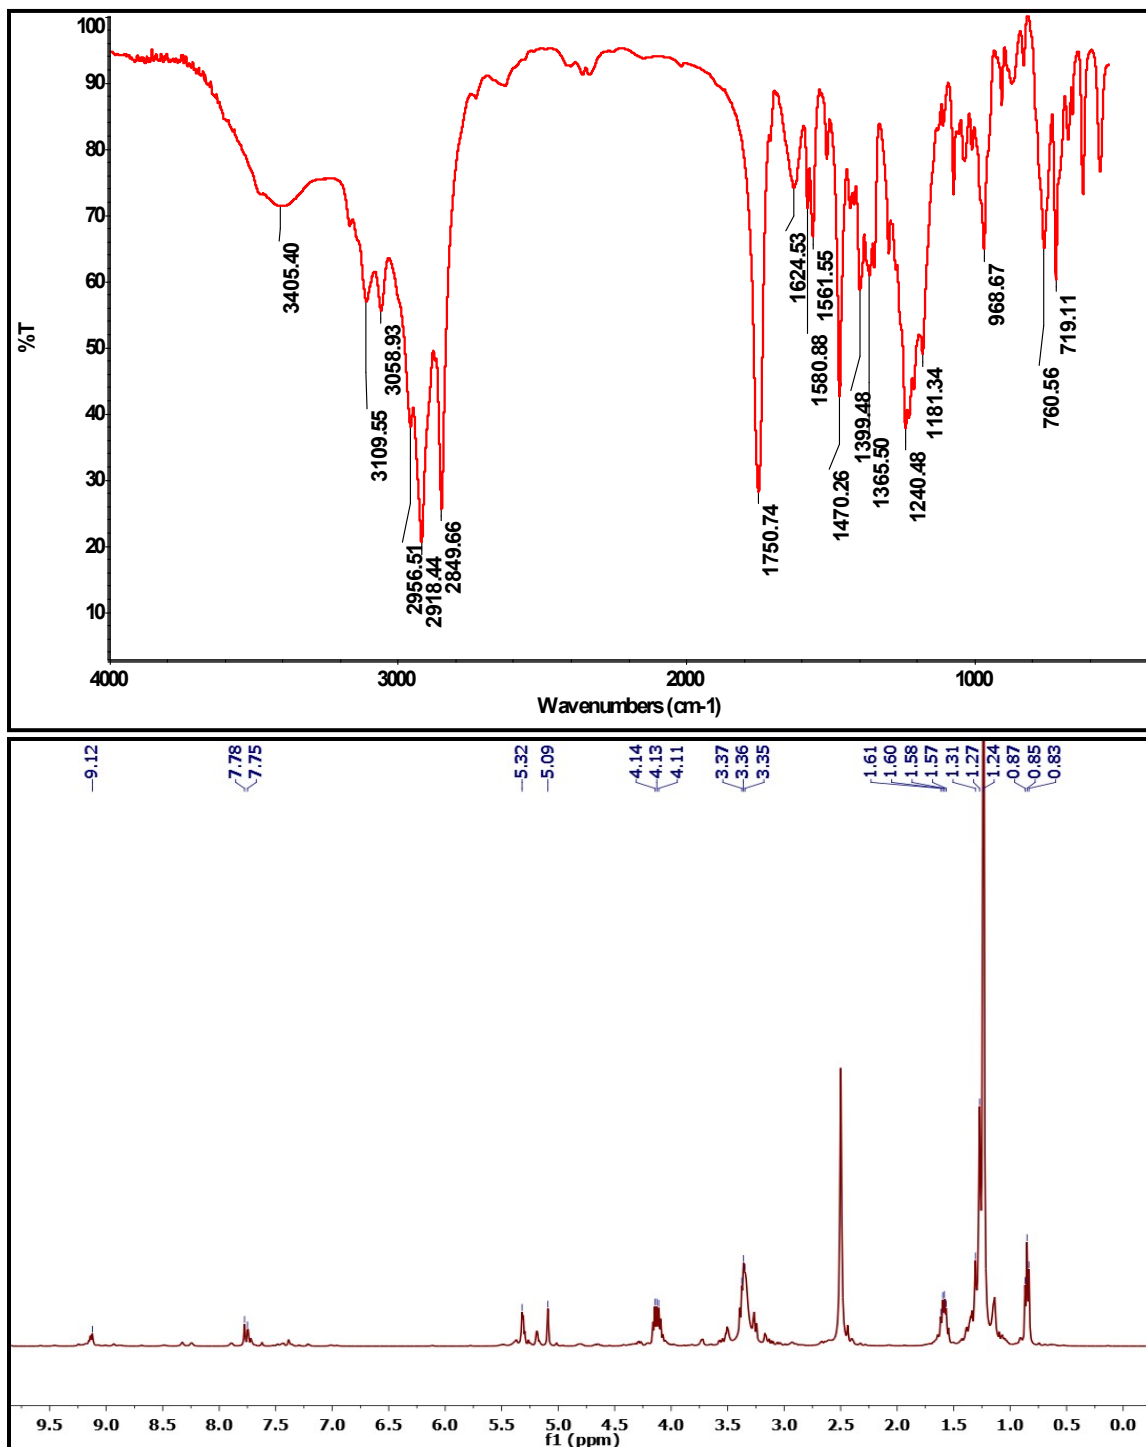

Figure S5. FT-IR and <sup>1</sup>H NMR (DMSO-*d*<sub>6</sub>) spectra of the GILBS 4c.
